1 Insulin resistance in cavefish as an adaptation to a nutrient-limited environment

2  
3  
4  
5  
6  
7  
8

9 Ariel Aspiras<sup>1\*</sup>, Misty Riddle<sup>1\*</sup>, Karin Gaudenz<sup>2</sup>, Robert Peuß<sup>2</sup>, Jenny Sung<sup>2</sup>, Brian  
10 Martineau<sup>1</sup>, Megan Peavey<sup>1</sup>, Andrew Box<sup>2</sup>, Julius A. Tabin<sup>1</sup>, Suzanne McGaugh<sup>3</sup>,  
11 Richard Borowsky<sup>4</sup>, Clifford J. Tabin<sup>1#</sup> and Nicolas Rohner<sup>2,5#</sup>

12  
13  
14  
15  
16  
17  
18  
19

20 <sup>1</sup>Department of Genetics Harvard Medical School, Boston, MA 02115, USA

21 <sup>2</sup>Stowers Institute for Medical Research, Kansas City, MO 64110, USA

22 <sup>3</sup>College of Biomedical Sciences, University of Minnesota, St. Paul, MN 55108, USA

23 <sup>4</sup>Department of Biology, New York University, New York, NY 10003, USA

24 <sup>5</sup>Department of Molecular and Integrative Physiology, University of Kansas Medical  
25 Center, Kansas City, KS 66160, USA

26  
27  
28  
29  
30  
31  
32  
33  
34  
35

36 \* These authors contributed equally to the study

37 # For correspondence: C.J.T. [tabin@genetics.med.harvard.edu](mailto:tabin@genetics.med.harvard.edu)

38 N.R. [nro@stowers.org](mailto:nro@stowers.org)

39

40 **Periodic food shortage is one of the biggest challenges organisms face in**  
41 **natural habitats. How animals cope with nutrient limited conditions is an**  
42 **active area of study, of particular relevance in the context of the current**  
43 **increasing destabilization of global climate. Caves represent an extreme**  
44 **setting where animals have adapted to nutrient-limited conditions, as most**  
45 **cave environments lack a primary energy source. Here we show that cave-**  
46 **adapted populations of the Mexican Tetra, *Astyanax mexicanus*, have**  
47 **dysregulated blood glucose homeostasis and are insulin resistant compared to**  
48 **the river-adapted population. We found that multiple cave populations carry a**  
49 **mutation in the insulin receptor that leads to decreased insulin binding *in***  
50 ***vitro*. Surface/cave hybrid fish carrying the allele weigh more than non-**  
51 **carriers, and zebrafish genetically engineered to carry the mutation similarly**  
52 **have increased body weight and insulin resistance. Higher bodyweight may be**  
53 **advantageous in the cave as a strategy to cope with infrequent food. In**  
54 **humans, the identical mutation in the insulin receptor leads to a severe form**  
55 **of insulin resistance and dramatically reduced life-span. However, cavefish**  
56 **have a similar lifespan to surface fish (of greater than fourteen years) and do**  
57 **not accumulate advanced glycated end products (AGEs) in the blood that are**  
58 **typically associated with progression of diabetes-associated pathologies. Our**  
59 **findings raise the intriguing hypothesis that cavefish have acquired**  
60 **compensatory mechanisms that allow them to circumvent the typical negative**  
61 **effects associated with failure to regulate blood glucose.**

62

63

64           Animals have evolved a range of physiological strategies to survive periods  
65 when nutrients are limited or absent, such as hibernation, diapause, torpor, and  
66 estivation<sup>1</sup>. Such strategies serve as a bridge to sustain the animal through a period  
67 of deprivation to a time of greater nutrient abundance. Cave-dwelling animals, in  
68 particular, must withstand long periods of nutrient limitation, as caves lack  
69 photosynthesis-driven primary producers, and hence cave food chains are  
70 dependent on energy input from external sources, such as seasonal floods or bat  
71 droppings<sup>2</sup>. To thrive under such harsh and unpredictable conditions, cave animals  
72 must evolve unique metabolic strategies that are currently not well understood.

73           The Mexican Tetra, *Astyanax mexicanus*, is a particularly useful model to  
74 study the genetic basis of metabolic adaptation. This species consists of a river-  
75 dwelling (surface) population and multiple cave-dwelling (cave) populations (Fig.  
76 1a) that experience dramatically different nutrient availability. In this study, we  
77 focused on three cavefish populations (named for the caves they inhabit: Tinaja,  
78 Pachón, and Molino) that have evolved independently from two different stocks of  
79 surface fish that invaded caves millions of years ago<sup>3</sup>. Tinaja and Pachón cavefish  
80 likely originated from a more ancient surface population than the Molino  
81 population<sup>4</sup>. More importantly, the surface morphs and all cave morphs are inter-  
82 fertile, allowing for genetic studies both in the wild and under laboratory  
83 conditions<sup>5,6,7</sup>.

84           We have previously shown that cavefish are starvation resistant compared to  
85 surface fish and lose a smaller fraction of their bodyweight after two months

86 without food<sup>8</sup>. Several factors have been identified that contribute to starvation  
87 resistance, including a reduction in metabolic circadian rhythm<sup>9</sup>, a general decrease  
88 in the metabolic rate<sup>10</sup>, and elevated body fat levels that serve as an energy dense  
89 reserve<sup>8,11</sup>. However, the genetic changes underlying these extreme metabolic  
90 adaptations remain largely unknown.

91 A critical aspect of metabolic homeostasis is the regulation of blood  
92 glucose<sup>12</sup>. We compared the blood glucose levels of lab-raised surface fish with lab-  
93 raised cavefish (Tinaja, Pachón, Molino) and found that one hour after eating, all  
94 three cave populations had significantly higher blood glucose (63, 76, 92 vs  
95 51mg/dL respectively, Fig. 1b). We further investigated the dynamics of glucose  
96 homeostasis during fasting by comparing surface and Tinaja populations. While  
97 Tinaja cavefish had significantly higher blood glucose levels after 24 hours of fasting  
98 (60 vs 52mg/dL,  $p=0.05$ , Fig. 1b), they were unable to maintain glucose homeostasis  
99 long-term, reaching as low as 22mg/dL after 21 days without food (mean 26mg/dL,  
100 Fig. 1c). In contrast, surface fish blood glucose did not change significantly over the  
101 same fasting period (52 vs. 45 mg/dL,  $p=0.49$ ). Our findings suggest that surface fish  
102 have tighter control of blood glucose levels.

103 To further test this hypothesis, we compared the acute control of glucose  
104 homeostasis using a glucose tolerance test (Fig. 1d). We injected glucose into the  
105 intraperitoneal (IP) cavity of both surface fish and Tinaja cavefish, transiently  
106 raising blood glucose levels to over 400 mg/dL in most fish (Fig. 1d). After eight  
107 hours, the blood glucose levels of the surface fish returned to the same levels as the  
108 PBS-injected controls (mean 126 vs 120mg/dL, Fig. 1d), while blood glucose levels

109 remained highly elevated in Tinaja cavefish, (mean 374mg/dL,  $p < 0.0005$ , Fig. 1d).  
110 Tinaja cavefish blood glucose levels decreased over time, but remained elevated  
111 compared to surface at both 14hrs (158 vs. 38mg/dL,  $p < 0.05$ , Fig. 1d) and 24hrs (85  
112 vs. 51mg/dL,  $p < 0.005$ , Fig. 1d) after glucose injection. These results suggest that  
113 cavefish have impaired glucose clearance.

114         Glucose homeostasis requires the balanced release of the hormones insulin  
115 and glucagon that signal to peripheral tissues to absorb glucose from the blood or  
116 produce glucose from stored glycogen<sup>13</sup>. We compared the levels and actions of  
117 these hormones between surface and Tinaja fish to gain further insight into their  
118 differences in glucose regulation. We did not detect a difference in the number of  
119 cells producing glucagon (54 vs 50,  $p = 0.678$ ) or insulin (54 vs 52,  $p = 0.275$ ) in 10-  
120 day old fish, ( $n = 5$  fish per population, Extended Data Fig. 1) and similarly we did not  
121 detect a difference in circulating glucagon levels in adult fish (Extended Data Fig. 2).  
122 Circulating insulin levels tended to be higher in Tinaja cavefish, but the results were  
123 not significant ( $n = 24$  fish per population, 2 age groups, and 3 samples per fish,  
124 Extended Data Fig. 3). Nonetheless, we found evidence of diminished insulin  
125 response in cavefish: we injected arginine into surface fish and cavefish to stimulate  
126 the simultaneous release of glucagon and insulin<sup>14</sup> and observed that while surface  
127 fish had a significant decrease in blood glucose level (80 vs 38mg/dL,  $p = 0.006$ ),  
128 Tinaja, Pachón, and Molino blood glucose did not change (Fig. 1e). In addition, we  
129 found that injection of recombinant human insulin caused a significant drop in  
130 blood glucose after 60 minutes in Surface fish but not in Tinaja cavefish (Extended  
131 data Fig.4 ). Our combined observations that glucagon and insulin levels do not

132 differ between surface and cavefish (Extended Data Fig. 2), and that cavefish do not  
133 decrease blood glucose levels in response to arginine or insulin (Fig. 1e, Extended  
134 data Fig. 4) suggest that cavefish may be insulin resistant.

135         Insulin-stimulated glucose uptake proceeds through phosphorylation of AKT  
136 at serine 473 (pAKT)<sup>15</sup>. We compared the ratio of pAKT vs AKT in freshly dissected  
137 cavefish and surface fish skeletal muscle treated with recombinant insulin (Fig. 1f,  
138 g). Consistent with the apparent dysregulation of glucose homeostasis, we observed  
139 lower pAKT levels in the Tinaja muscle after insulin treatment (mean 1.39 vs 0.775  
140 average pAKT/AKT,  $p=0.017$ , Fig. 1f, g), suggesting that Tinaja cavefish are indeed  
141 insulin resistant relative to surface fish. To study if insulin resistance evolved as a  
142 common feature in derived cavefish populations, we tested insulin sensitivity in  
143 Pachón and Molino. Interestingly, Pachón muscle had lower pAKT levels in response  
144 to insulin (mean 0.806 average pAKT/AKT,  $p=.027$ , Fig. 1f, g), but despite having  
145 elevated blood glucose (Fig. 1b), Molino pAKT levels were equivalent to surface fish  
146 (mean 1.26 average pAKT/AKT,  $p=0.99$ , Fig. 1f, g). Our results suggest that Tinaja  
147 and Pachón evolved altered blood glucose regulation and insulin resistance in  
148 parallel, and that Molino may have evolved altered glucose metabolism through a  
149 different mechanism.

150

151

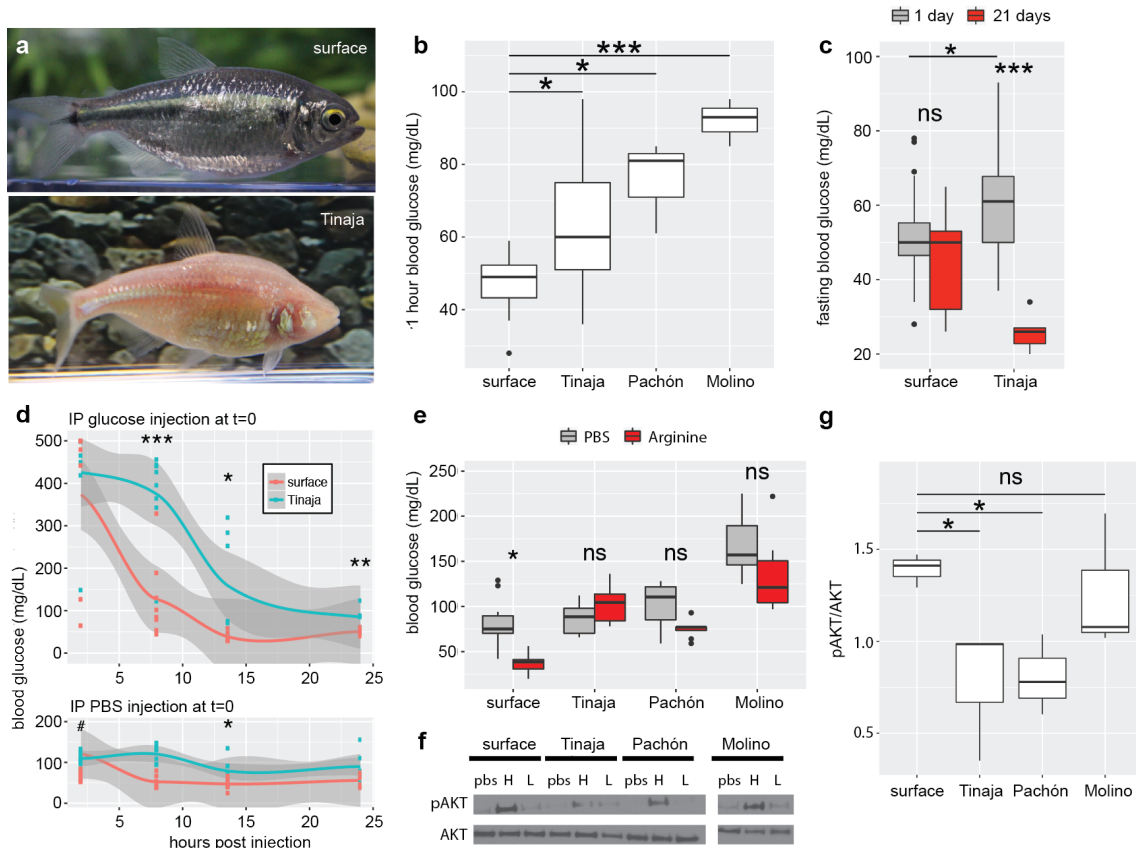

152

153 **Figure 1. Altered glucose homeostasis in cave-adapted *Astyanax mexicanus***  
 154 **populations (Tinaja, Pachón, Molino)**

155 **a**, Photograph of surface fish and Tinaja cavefish of the same species, *Astyanax*  
 156 *mexicanus*. **b**, Blood glucose levels one hour after eating in surface fish compared to  
 157 three independently-evolved cavefish populations (n=10, 13, 3, 3 respectively). **c**,  
 158 Blood glucose level in surface and cave (Tinaja) populations after 1 day (n=28 fish  
 159 per population) versus 21 days (n=9 fish per population) without food. **d**, Glucose  
 160 tolerance test. Blood glucose level after IP injection of glucose (top) or PBS  
 161 (bottom). Data points represent values for individual fish and grey shade indicates  
 162 95% confidence interval for polynomial regression. (# outlier for Tinaja with blood  
 163 glucose level of 500 mg/dL not shown on graph). **e**, Blood glucose level 5 hours after  
 164 inducing both glucagon and insulin by IP injection of arginine (n=10 fish per  
 165 population and condition). **f**, Representative western blot showing cell lysates  
 166 probed with pAKT (ser473) and AKT antibodies. Lysates were produced from  
 167 skeletal muscle treated *ex vivo* with pbs, high (1x), or low (0.1x) level of  
 168 recombinant insulin (x=9.5-11.5  $\mu\text{g}/\text{mL}$  insulin). **g**, Quantification of bands by  
 169 densitometry of the highest concentration treatment (n=3 fish per population).  
 170 Significance codes from one-way ANOVA with HSD post hoc test, ns p>0.05, \*p<0.05,  
 171 \*\*p<0.005, \*\*\*p<0.0005.

172

173           To gain insight into the genetic mechanism underlying the observed insulin  
174 resistance in cavefish, we examined the sequences of all known genes in the insulin  
175 pathway using the available genome sequence<sup>16</sup> (Extended data 1). Strikingly, we  
176 found a coding difference in the insulin receptor gene (*insra*) between surface fish  
177 and cavefish, affecting a highly conserved proline in the extracellular cysteine rich  
178 domain (P211L, Fig. 2a-c). The presence of the mutation correlates with the insulin  
179 resistance phenotype, as both Tinaja and Pachón populations carried the mutation,  
180 while Molino cavefish showed the wildtype allele (Fig. 2b, c). Notably, the same  
181 genetic alteration is implicated in at least two known cases of Rabson-Mendenhall  
182 syndrome<sup>17,18</sup>, a form of severe insulin resistance in humans (Fig. 2c). The  
183 biochemical impact of the mutation has not been previously explored, but the  
184 position in the cysteine-rich domain suggests a role in insulin binding<sup>19</sup>. To test this,  
185 we generated transgenic HEK293T (Flp-In-293) cell lines that stably express the  
186 full-length surface fish or Tinaja cavefish *insra* and incubated the cells with different  
187 concentrations of FITC-labeled human insulin. We measured fluorescence as a  
188 readout for binding efficiency using an image-based cytometry approach  
189 (ImagestreamX MarkII) and found that cells expressing the cavefish receptor  
190 displayed significantly lower binding at all but the lowest concentrations of insulin  
191 (Fig. 2d). Our results suggest that the *insra* P211L mutation affects insulin signaling  
192 by altering insulin binding efficiency.

193



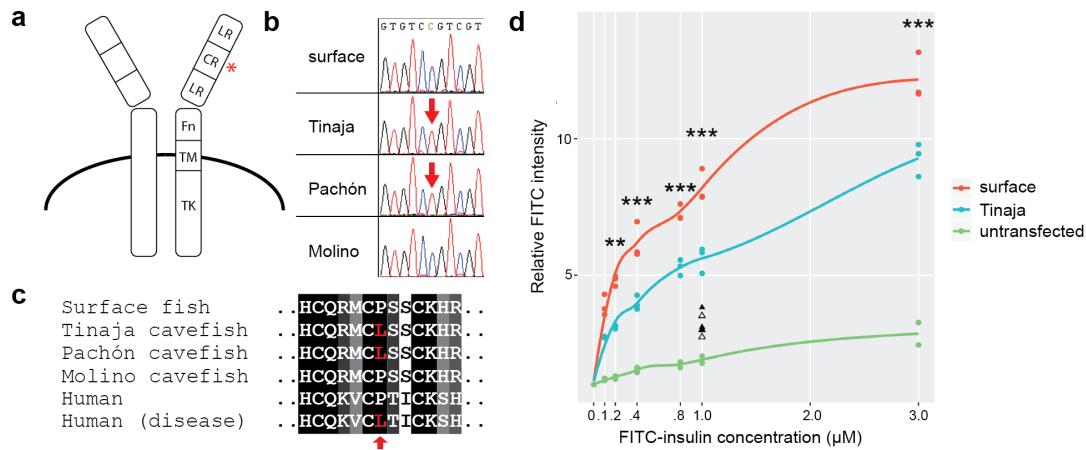

194

195 **Figure 2: Coding mutation in the cavefish insulin receptor leads to decreased**  
 196 **insulin binding**

197 **a**, Schematic representation of the insulin receptor and main domains (adapted  
 198 from<sup>20</sup>. The red asterisk depicts position of P211L mutation in cavefish. LR, leucine-  
 199 rich repeats; CR, cysteine-rich domain; Fn, fibronectin type III domain; TM,  
 200 transmembrane domain; TK, tyrosine-kinase domain. **b**, Sequence chromatogram of  
 201 the mutation present in Pachón and Tinaja cavefish populations. **c**, Amino acid  
 202 alignment of the P211L mutation and neighboring amino acids of the insulin  
 203 receptor in *Astyanax mexicanus* and healthy humans and patients with Rabson-  
 204 Mendelhall syndrome. **d**, Relative FITC intensity of HEK293T (Flp-In-293) cells  
 205 stably transfected with FLAG-tagged surface fish or Tinaja cavefish insulin receptors  
 206 and incubated with indicated concentration of FITC-labeled insulin. Each point  
 207 represents mean FITC intensity of >2,500 live cells normalized to the mean intensity  
 208 of untreated cells. Lines represent results from local polynomial regression fitting.  
 209 Triangles represent data from competitive binding assay: surface (filled) or Tinaja  
 210 (unfilled) Flp-In-293 cells were incubated with the addition of 10µM unlabeled  
 211 insulin. Significance codes are from one-way ANOVA (between surface and Tinaja)  
 212 with Tukey's HSD post hoc test, \*p<0.05, \*\*p<0.005, \*\*\*p<0.0005.

213

214

215 We found that two independently-derived cavefish populations (from the  
 216 Tinaja and Pachón caves) carry the same P211L mutation, suggesting parallel  
 217 molecular evolution and selection for the mutation in the cave environment<sup>21</sup>. To  
 218 extend these observations, we tested for the presence and frequency of the P211L  
 219 mutation in fish living in their natural habitats. We sequenced 71 wild-caught

220 surface fish samples from different localities, and 51 cavefish samples from 6  
221 different caves (Extended data 2, Fig. 3a). In line with our previous observations, the  
222 mutation was absent in all the Molino samples (n=8), but present in all other tested  
223 cave populations (Tinaja, Yerbaniz, Pachón, Japonés, Arroyo, combined n=36).  
224 Notably, the cave populations carrying this mutation are all derived from the same  
225 ancestral stock of surface fish<sup>22</sup>. Although the mutation was partially present in  
226 heterozygote conditions in some of these caves, we did not find any cavefish that  
227 were homozygous for the surface allele despite continuous gene flow from the  
228 surface population<sup>22</sup> (Fig. 3a). Our findings suggest the likelihood that there is active  
229 selection for the mutation in the caves, and also indicate a partially dominant effect  
230 of the cave allele. We did not detect the cave allele in any of the surface fish samples,  
231 suggesting that the mutation either appeared *de novo* in the cave populations,  
232 represents a rare variant not detected by our sampling frequency, or is absent in the  
233 current surface population, but was present in the ancestral surface fish stocks<sup>22</sup>.  
234 We reexamined the available whole genome data from different cave and surface  
235 populations (McGaugh et al, unpublished) to investigate these hypotheses. We found  
236 that *insra* is not exceptional in its divergence between cave and surface fish using  
237 multiple independent statistical methods ( $F_{ST}$ ,  $D_{XY}$ , of hapFLK results; Extended Data  
238 Table 1), arguing against a recent *de novo* occurrence of the mutation. In addition,  
239 we did not observe extreme reductions in diversity or exceptionally long tracts of  
240 homozygosity which would be indicative of recent hard selective sweeps ( $\pi$ , H-  
241 SCAN; Extended Data Table 1). Pachón cave, Tinaja cave, and surface populations  
242 exhibit negative Tajima's D, which can under some scenarios indicate selection<sup>23</sup>,

243 however, the values are not exceptional when compared to the rest of the genome.  
244 Our current hypothesis is that the mutation represents a rare variant in the  
245 ancestral or current stock of surface fish that fell under positive selection upon  
246 invasion of the caves.

247

248 We next sought to investigate the adaptive value of the mutation in the cave  
249 environment. Insulin resistance can result from obesity, but conversely it can also  
250 drive processes leading to adipogenesis and fat storage<sup>24</sup>. We found that cavefish  
251 weigh more than surface fish on a nutrient limited diet (2.08 vs 1.52 grams,  $p=0.02$ ,  
252 Fig. 3b), raising the intriguing possibility that the insulin resistance in cavefish is  
253 part of an adaptive strategy to increase weight and thus survivability during food  
254 deprivation. To test for the influence of the *insra* mutation on weight, we genotyped  
255 and weighed 124 surface/Tinaja male F<sub>2</sub> fish at approximately 1.5 years of age. We  
256 focused on males, as egg mass varies between individual females and can account  
257 for as much as 41% of female body weight (Extended Data Fig. 5), thus representing  
258 a potentially significant confounding variable if included in our analysis. Notably, we  
259 found that males carrying one or two copies of the cave P211L *insra* allele weigh on  
260 average 27% more than hybrids carrying only the surface allele (1.63 vs 1.28 grams,  
261  $p = 0.006$ , Fig. 3c). To test if the difference in weight is entirely attributable to  
262 metabolic differences in processing ingested food or is also affected by differences  
263 in consumption when fed *ad libitum*, we individually housed the fish and fed them a  
264 controlled diet of 6 mg of food per day for 4 months. On average, both carriers and  
265 non-carriers of the mutated *insra* allele gained weight, but no significant difference

266 was observed in percent weight gain (17.3% and 20.5%, respectively; p-value:  
267 0.68), underscoring the importance of overeating in combination with insulin  
268 resistance to increase body weight<sup>8</sup>. After four months on the controlled diet,  
269 carriers of the cave allele still weighed significantly more than homozygous surface  
270 carriers (1.82 vs 1.47 grams,  $p=0.004$ , Fig. 3d). These findings indicate a role of the  
271 cavefish *insra* locus on weight gain, but cannot entirely exclude the possibility of  
272 another effect of a different gene in cis to the P211L mutation.

273 To verify that the phenotypes we have associated with the P211L mutation in  
274 cave fish are indeed due to the alteration of the *insra* gene, we used CRISPR gene  
275 editing to introduce the P211L mutation into the *insra* gene in zebrafish (*Danio*  
276 *rerio*) via homology directed repair<sup>25</sup> (Supp. Figure 1, Figure 3e). We have shown  
277 that the P211L mutation causes a decrease in insulin binding (Fig. 2d). To determine  
278 if decreased binding causes insulin resistance in zebrafish, we measured the ratio of  
279 pAKT/AKT in freshly dissected zebrafish skeletal muscle treated *ex vivo* with insulin  
280 or PBS (Fig. 3f). We found that the ratio of pAKT/AKT is less in zebrafish that are  
281 homozygous for the P211L mutation compared to heterozygous fish for both PBS  
282 (0.05 vs 0.13,  $*p=0.016$ ) and insulin treated conditions (0.13 vs 0.32,  $p=0.067$ ,  $n=3$   
283 fish per genotype and condition). We next tested whether this insulin resistance is  
284 sufficient to explain the increase in weight we observe in cavefish carrying the  
285 P211L mutation. We paired heterozygous fish with successful germline  
286 transmission and weighed their progeny shortly before maturity (55 dpf) to avoid  
287 gonadal effects on weight. We found that zebrafish homozygous for the cave allele  
288 are longer (20.0 mm vs 18.4 mm,  $p=0.0046$ ) and weigh more (124.6 mg vs 99.7 mg,

289  $p=0.022$ ) than their siblings raised under the same conditions (Fig. 3e, g, h). Thus,  
 290 our findings show that the P211L mutation is sufficient to explain both the insulin  
 291 resistance and increased weight that we observe in Tinaja cavefish.

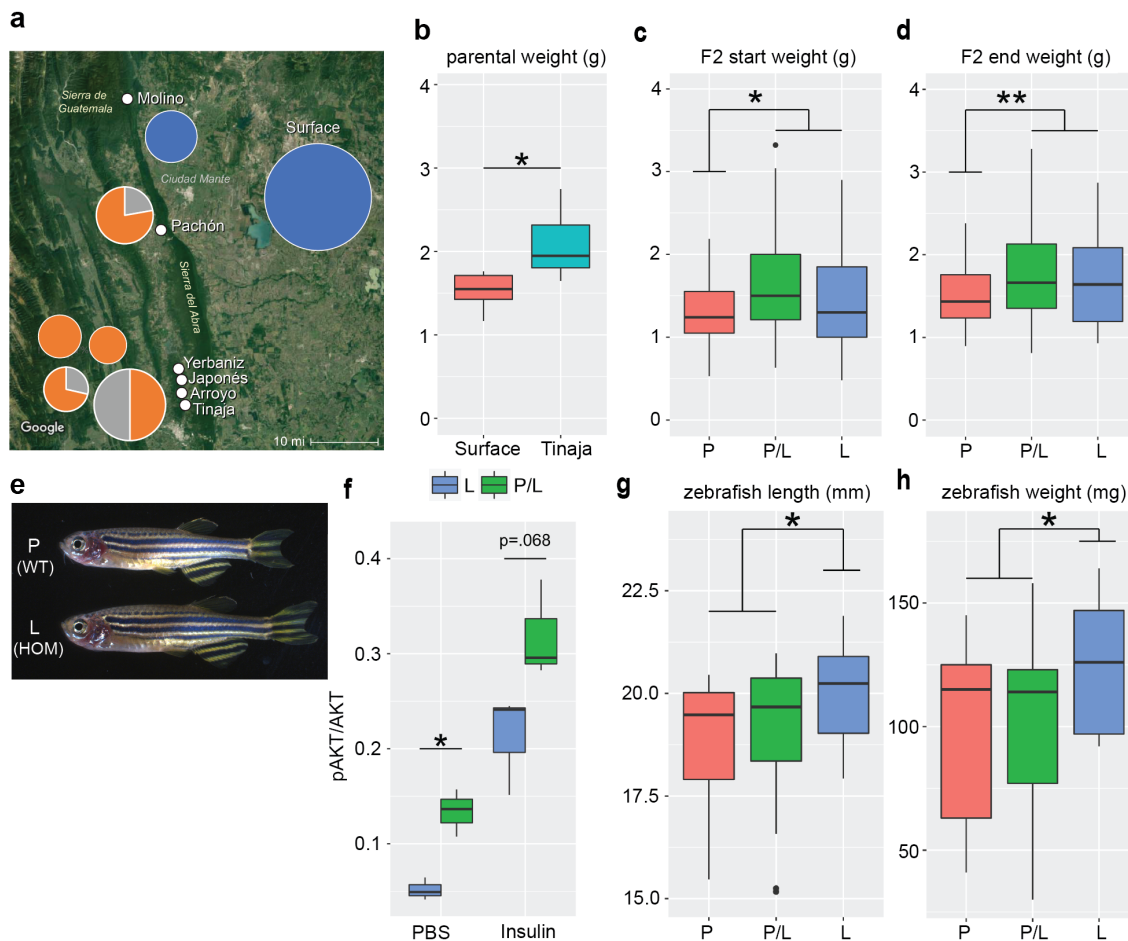

292

293 **Figure 3: The P211L *insra* allele shows signs of selection in cave environments**  
 294 **and is associated with higher body weight in surface/cave hybrids**

295 **a**, Genotyping of the *insra* gene for the presence of the derived allele (P211L) in  
 296 wild-caught samples. Pie charts indicate percentage of fish with the surface allele  
 297 (blue), cave allele (orange), or both (grey), and size of pie chart roughly indicates  
 298 number of fish genotyped (Molino  $n=8$ , Surface  $n=71$ , Pachón  $n=9$ , Yerbaniz  $n=8$ ,  
 299 Japonés  $n=5$ , Arroyo  $n=7$ , Tinaja  $n=14$ ). The cave allele is absent in all the wild-  
 300 caught surface fish and Molino cavefish (new lineage). In all sampled cavefish  
 301 populations from the old lineage, the P211L mutation was present. Tinaja, Yerbaniz,  
 302 Japonés, and Arroyo are geographically close and believed to represent a single  
 303 invasion event; Pachón represents an independent invasion<sup>26</sup>. The deviation from  
 304 Hardy-Weinberg equilibrium suggests that selection is acting on the locus favoring  
 305 the presence of the mutation in the cave environments. Map source: Imagery ©2017

306 Landsat/Copernicus, Map data ©2017 Google, INEGI **b**, Boxplot showing weight of  
307 Tinaja males (n=6) and surface males (n=5) on a nutrient limited diet. **c**, Weight of  
308 18-month-old F2 male Tinaja/surface hybrids sorted for presence of the P211L  
309 mutation (P-homozygous surface (n=22), L-homozygous cave (n=27), P/L  
310 heterozygotes (n=53)). Mean weight of F2 fish homozygous for the surface allele  
311 (1.28 gram; n=22) is significantly less than F2 fish carrying at least one of the cave  
312 alleles (1.63 gram; n=80; \*p=0.006). **d**, Weight of the same F2 fish after four months  
313 on a limited nutrient diet. Mean weight of F2 fish homozygous for the surface allele  
314 (1.47 gram; n=22) is significantly less than F2 fish carrying at least one of the cave  
315 alleles (1.82 gram; n=80; \*\*p=0.004). Absolute weight change (not shown, surface  
316 allele: 0.193 gram, cave allele: 0.185 gram) or percent weight change (surface allele:  
317 20.5%, cave allele 17.3%) is not significant (p=0.88, and p=0.67 respectively). **e**,  
318 Representative pictures of a WT sibling and a homozygous P211L zebrafish mutant.  
319 **f**, Ratio of pAKT/AKT in adult zebrafish skeletal muscle treated *ex vivo* with insulin  
320 or PBS. The ratio of pAKT/AKT is significantly less in zebrafish homozygous for the  
321 P211L mutation compared to heterozygous fish (n=3 fish per genotype and  
322 condition). Significance codes are from two-tailed students t-test, \*p<0.05,  
323 \*\*p<0.005. **g**, **h**, Length and weight of 55dpf zebrafish sorted by presence of the  
324 P211L mutation (n=11(L), 13(P), 22(P/L)).  
325

326

327         The extreme metabolic phenotypes, reminiscent of Type 2 diabetes (insulin  
328 resistance, hyperglycemia), in conjunction with the fact that cavefish have a fatty  
329 liver<sup>8</sup>, raise the question whether cavefish have pathologies that are characteristic of  
330 these phenotypes in other species and are therefore less healthy than surface fish. If  
331 so, it would suggest an evolutionary trade-off wherein the cavefish might have  
332 sacrificed other aspects of physiological health to reap the benefits of starvation  
333 resistance. Alternatively, the fish could have evolved unique compensatory  
334 mechanisms allowing them to remain healthy despite potential deleterious  
335 metabolic changes. In support of the latter idea, surface fish and cavefish live longer  
336 than fifteen years in the laboratory with no noticeable differences in fertility decline.  
337 However, we find that surface fish begin to exhibit classic signs of aging in fish (e.g.  
338 <sup>27</sup>) by age fifteen, such as sunken skin, tattered fins, and a hunched back (Fig 4a)

339 while Tinaja and Pachón can live in excess of fourteen years without these  
340 indications of senescence (Fig. 4b,c).

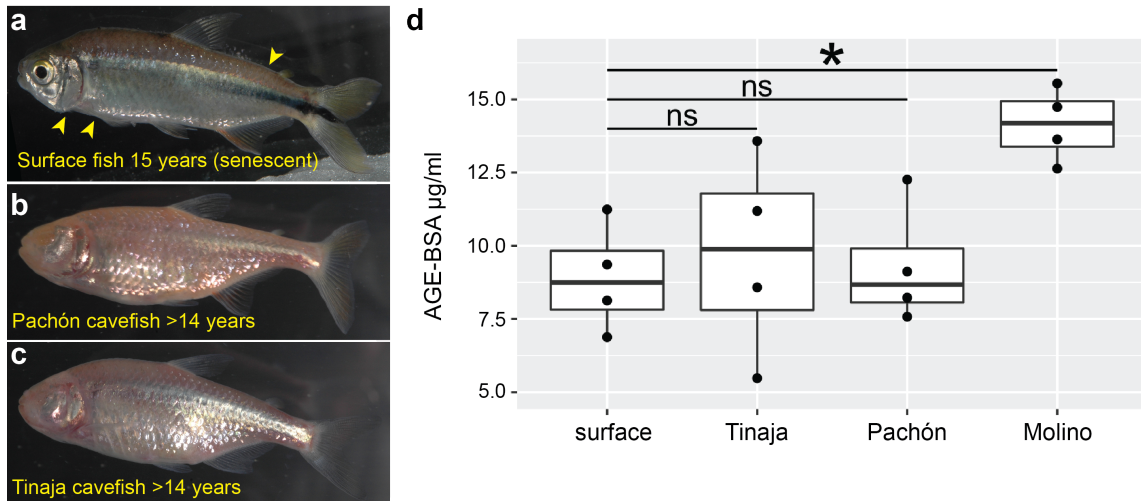

341

342

343 **Figure 4: Despite elevated blood glucose levels and insulin resistance, Tinaja**  
344 **and Pachón cavefish do not show signs of senescence and do not accumulate**  
345 **advanced glycated end products in the blood.**

346 **a-c**, Surface fish (a), Pachón cavefish (b), and Tinaja cavefish (c) kept in the  
347 laboratory for the indicated duration and fed *ad libitum*. Cavefish were wild caught  
348 and the ages represent their minimum age. **a**, Surface fish shows signs of aging  
349 (yellow arrows) that are absent in cavefish at comparable ages (**b**, **c**). **d**,  
350 Quantification of advanced glycated end products (AGE-BSA g/mL) in serum from  
351 approximately 2-year-old surface, Tinaja, Pachón and Molino fish after a three-day  
352 fast (n = 4 for each population). Tinaja and Pachón AGE levels are not significantly  
353 different from surface (mean 9.7, 9.3, 8.9 respectively, ns, not significant). Molino  
354 AGE (mean 14) is significantly higher than surface (\*p-value <0.05, one-way ANOVA  
355 with Tukey's HSD post-hoc test).  
356

357

358 In humans, sustained high blood glucose levels and dysregulation of glucose  
359 homeostasis can lead to cell damage over time. A major cause of morbidity in human  
360 diabetic patients with long-term elevation in blood glucose is tissue damage caused  
361 by excessive non-enzymatic glycation of proteins in the blood, generating advanced

362 glycation end-products (AGEs)<sup>28</sup>. AGEs are closely associated with diabetes induced  
363 vascular damage, cardiovascular disease, and aging<sup>29</sup>. We compared the level of  
364 AGEs in the serum of two year-old cavefish and surface fish that had been fed *ad*  
365 *libitum* their entire lives (Fig. 4b). Interestingly, we did not detect any differences in  
366 the levels of AGEs between Tinaja and Pachón cavefish, relative to surface fish  
367 (mean of 9.7, 9.3, and 8.9 µg/ml respectively,  $p=0.99, 0.95$ ), in spite of elevated  
368 blood glucose levels in fish from these cave populations (Fig. 1b). This result  
369 suggests that these two cavefish populations may have mechanisms for reducing  
370 protein glycation, rendering them impervious to the damaging effects of elevated  
371 blood glucose. Notably, the Molino cavefish, which we found are not insulin resistant  
372 but nonetheless show higher blood sugar levels, do have elevated levels of AGEs  
373 compared to surface fish (mean 14.1 vs. 8.9 µg/ml,  $p=0.03$ ). It remains to be  
374 determined if the health and longevity of the Molino population is influenced by  
375 accumulation of AGEs, but our results suggest they may have evolved altered blood  
376 glucose homeostasis through a different mechanism than Tinaja and Pachón cavefish.  
377 Insulin resistance in human patients carrying the Tinaja and Pachón-specific  
378 mutation in *insra* is accompanied by additional sequelae, including dental dysplasia,  
379 and growth retardation<sup>17,18</sup>, neither of which are observed in cavefish<sup>30</sup>.

380 All organisms need to adapt to the environments in which they live. This  
381 includes optimizing the utilization of the nutrients available to them, in addition to  
382 evolving strategies for finding food and for avoiding predation. Yet far less is known  
383 about metabolic adaptation than, for example, morphological evolution. Our results  
384 suggest a unique, and perhaps surprising, metabolic strategy adopted by cavefish in



385 response to annual extended periods of extreme nutrient deprivation. In particular,  
386 the cave morphs of *Astyanax mexicanus* alter blood glucose levels as a partial  
387 mechanism for rapidly increasing body weight during brief periods of abundance.  
388 These findings highlight the extreme physiological measures that can evolve in  
389 critical, and otherwise highly conserved, metabolic pathways to accommodate  
390 exceptional environmental challenges. Additionally, our findings establish cavefish  
391 as a natural model to investigate resistance to pathologies of diabetes-like  
392 dysregulation of glucose homeostasis. As such, further understanding cavefish  
393 metabolism may reveal factors that can help eliminate both short-term and long-  
394 term negative effects of elevated blood glucose levels in humans, as well as  
395 providing further insight into the metabolic changes that can allow organisms to  
396 adapt to extreme environments.

397

## 398 **Methods**

### 399 **Fish husbandry and diet**

400 Unless stated otherwise, fish were fed *ad libitum* with a combination of New Life  
401 Spectrum TheraA+ small fish formula and *Artemia*, and housed at densities of less  
402 than, or equal to, two adult fish per liter of water. F2 hybrids were housed  
403 individually in 1.5L tanks and fed three pellets (~6mg) of New Life Spectrum  
404 TheraA+ small fish formula once per day for >4 months. For the starvation  
405 experiment, fish were moved to individual containers and water was changed daily.  
406

### 407 **Blood glucose, glucose tolerance, and arginine tolerance**

408 Blood was collected from the caudal tail vein using a U-100 insulin needle and  
409 glucose was measured using Freestyle lite blood glucose meter and test strips.  
410 Glucose (2.5mg/gram fish), arginine (6.6 $\mu$ M/gram fish), or PBS was injected into the  
411 intraperitoneal cavity using a U-100 insulin needle.

412

### 413 **pAKT quantification**

414 We quantified pAKT level in fillets of skeletal muscle taken directly after fish  
415 decapitation. For *A. mexicanus*, skeletal muscle was cut into three equal strips per  
416 fish. Strips were incubated in PBS, X, 0.1X concentration of recombinant Human  
417 insulin for 25 mins (sigma product I9278, X = 9.5-11.5 µg/mL insulin). The tissues  
418 were rinsed in pbs and then homogenized and lysed in RIPA buffer (SIGMA) with  
419 protease and phosphatase inhibitor (Pierce™ Protease and Phosphatase Inhibitor  
420 Mini Tablets, EDTA Free) for 30 mins. Protein concentration was measured via BCA  
421 (Pierce). Lysate protein concentrations were then equalized and run on 4-12% Bis-  
422 Tris protein gel and transferred on a nitrocellulose membrane. Blots were probed for  
423 AKT (Cell Signalling). Following stripping, blots were probed for phospho-AKT  
424 (ser473) (Cell Signalling). Densitometry was done on imageJ. For *D. rerio* two fillets  
425 of skeletal muscle were removed from both sides of fish directly after decapitation.  
426 Fillets were rinsed in PBS and then incubated in PBS or 10µg/mL human  
427 recombinant insulin (sigm, I0908) for approximatley 40 minutes. The skin was then  
428 removed from the skeletal muscle and the muscle was finley minced using a scalpel.  
429 We quantified the ratio of pAKT/AKT using the Akt(pS473) + total Akt ELISA Kit  
430 (abcam ab126433) according to the manufacturers protocol. We used 200µL lysis  
431 buffer per sample and loaded 85µL of lysate per well.

432

### 433 **INSRA P211L genotyping**

434 Genomic DNA from tail fin clips was diluted 5-fold and used as target DNA to  
435 amplify the *insra* locus using the following oligonucleotide primers: insra\_f:  
436 GCACCCTTACACCCTTACATGA; insra\_r: TACCGCTCAGCACTAATTTGGA; Product  
437 size: 700 bp. PCR reactions were carried out in 12.5 µl volume containing 1X LA PCR  
438 Buffer II (Clontech), 2.5 mM MgCl<sub>2</sub>, 0.4 mM dNTP mix, 0.4 uM of each forward and  
439 reverse primer and 0.05 units of TaKaRa LA Taq DNA Polymerase (Clontech). The  
440 PCR cycling conditions were as follows: Initial denaturation at 94°C for 2 min,  
441 followed by 35 cycles of 94°C for 30 sec, annealing temperature 52°C for 30 sec and  
442 72°C for 1 min. A final 5 min elongation step was performed at 72°C. The PCR  
443 products were diluted 10-fold and sequenced directly on a 3730XL DNA Analyzer  
444 (Applied Biosystems) using the sequencing primer: GGTGGAGTTGATGGTGGTATAG.

445

### 446 **Selection scans at the *insra* locus**

447 We examined the *insra* locus with data that is a part of an ongoing genome-wide  
448 selection and demography companion study (Herman et al. in preparation).  
449 Methods are explained in greater detail in the companion study, but briefly, we used  
450 Illumina Hiseq 2000 to sequence 100bp reads from 6-10 individuals from each  
451 population of Tinaja cave, Molino cave, Pachón cave, Rascon surface, and Río Choy  
452 surface populations, (total N = 43) and two individuals from the sister taxa *A.*  
453 *aeneus*. Individuals were sequenced with v3 chemistry. Reads were cleaned with

454 Trimmomatic v0.30<sup>31</sup> and cut-adapt v1.2.1  
455 (<http://dx.doi.org/10.14806/ej.17.1.200>) and aligned to the reference Pachón  
456 genome using bwa-mem algorithm in bwa-0.7.1<sup>32</sup> resulting in an aligned coverage  
457 depth of ~7-12x. Variants were called using the Genome Analysis Toolkit v.3.3.0  
458 (GATK)<sup>33</sup> and Picard v1.83 (<http://broadinstitute.github.io/picard/>). Outlier scan  
459 metrics ( $\pi$ , DXY, FST, Tajima's D) were conducted using VCFtools v0.1.13<sup>34</sup> and  
460 custom scripts. HSCAN (<http://messerlab.org/software/>) and hapFLK<sup>35</sup> were also  
461 used in examining *insra* for outliers. Metrics were dense ranked across the genome  
462 and the ranking position of *insra* was used to determine if it was exceptionally  
463 divergent between cave and surface populations relative to the rest of the genome.  
464

### 465 **Glucagon and Insulin quantification**

466 The number of cells producing insulin or glucagon were determined using the  
467 following protocol: 10-11dpf fish were euthanized with an overdose of tricane and  
468 fixed in 4% paraformaldehyde overnight at 4°C. Fish were washed in PBST,  
469 transferred to water for 1 minute, acetone for 10 minutes at -20°C, water for 1  
470 minute, then washed in PBST. Blocking in 5% donkey serum, 1% DMSO, and 0.2%  
471 BSA was done for 1 hour at room temperature. Fish were incubated with primary  
472 antibodies (1:200 sheep anti-Glucagon (abcam), 1:200 guinea pig anti-  
473 Insulin (Dako)) and then secondary antibodies (1:400 donkey anti-sheep 488, 1:400  
474 goat anti-guinea pig 647) overnight at room temperature in glass vials, then washed  
475 with PBST, stained with DAPI, and imaged. Images were collected at 63X using a  
476 1.0 $\mu$ m z-stack on a Zeiss 780 confocal microscope. Nuclei surrounded by insulin or  
477 only glucagon were counted manually using FIJI cell counter.

478 To quantify circulating glucagon level, we collected serum from the caudal tail vein  
479 of fish that were approximately 2-years-old and were fasted for 24 hours (n=12 for  
480 each population). The serum was used for a Glucagon radioimmunoassay according  
481 to the manufacturer protocol (MGL-32K; Millipore, Billerica, MA). To quantify  
482 circulating insulin level we collected plasma from the caudal tail vein of 2-year-old  
483 and 1-year-old fish and blotted the serum onto a nitrocellulose membrane using a  
484 BIO-RAD Bio-dot sf device. Ponceau protein staining was used to verify equal  
485 protein loading after which insulin was probed using anti-Insulin  
486 (DAKO). Quantification of insulin levels was done using FIJI-imageJ.  
487

### 488 **Insulin Binding Experiment**

489 The full-length *Astyanax mexicanus insra* protein-coding sequence was amplified  
490 from Surface fish (S) and Tinaja cavefish (T) cDNA and cloned into a modified  
491 pcDNA3.1/Hygro vector providing an N-terminal FLAG epitope tag<sup>36</sup>. To generate  
492 stable cell lines, the FLAG-tagged *insra* cassettes were cloned into pcDNA5/FRT  
493 vector (Invitrogen cat# V601020) allowing for Flp recombinase-mediated

494 integration into the Flp-In-293 cell line (Invitrogen cat# R75007) per the  
495 manufacturer's procedures. One positive clone from each S and T cell line was  
496 selected and used for the insulin-binding assays. 100mm plates were seeded at 30%  
497 confluency and cultured in DMEM/10%FBS+1xGlx media for 48 hours. The plates  
498 were then changed to insulin-free FreeStyle 293 Expression Medium (cat#  
499 12338018) and incubated for an additional 24 hours. Plates at ~70-80% confluency  
500 were pre-chilled for 30 min at 4°C, and the medium replaced with 5 ml of cold  
501 FreeStyle 293 Expression Medium containing 42mM HEPES pH7.5 and human FITC  
502 labeled insulin (Sigma cat# I3661) at final concentrations of 0, 0.1, 0.2, 0.4, 0.8, 1  
503 and 3  $\mu$ M. For binding competition, 10  $\mu$ M of unlabeled human insulin (Sigma cat#  
504 I9278) and 1  $\mu$ M of human FITC labeled insulin were added. After one hour  
505 incubation in the dark at 4°C, the medium was removed and the plates were washed  
506 with 5mL of cold 1x PBS. Cells were dissociated in 2mL of 0.5mM EDTA in PBS at  
507 37°C for 7 min, transferred into Eppendorf tubes, pelleted for 5 min at 200xg at 4°C  
508 and resuspended in 1mL of cold 1x PBS. To stain dead cells, 1  $\mu$ l of Fixable Viability  
509 Dye (FVD eFluor450, Invitrogen cat# 65-0863) was added to each 1mL of cell  
510 suspension and incubated on ice in the dark for 20 min. Subsequently, the cells were  
511 washed once with cold 1x PBS and fixed in 1mL of 4% formaldehyde. After two  
512 more washes with cold 1x PBS, the cells were resuspended in 150 $\mu$ l of cold 1x PBS,  
513 filtered through a 70 $\mu$ m cell strainer (Filcons 070-67-S) and transferred into a  
514 round-bottom 96-well plate. Binding data was acquired on an ImagestreamX MarkII  
515 (EMD Millipore) at 40x. FITC was excited with 150mW 488nm on camera 1 and  
516 detected on channel 2. Fixable live/dead was excited with 12mW 405nm on camera  
517 2 and detected on channel 7. Single color controls were used for color  
518 compensation. Bright field was collected on channels 5 and 11. Analysis was  
519 performed in IDEAS v6.2 and fluorescence intensity was reported as integrated  
520 intensity within an adaptive erode mask for bright field.

521

## 522 **Genome editing in zebrafish using the CRISPR/Cas9 technology**

### 523 Guide-RNA and donor design

524 We designed the guideRNA target sites using the web tool by the MIT Zhang lab  
525 (<http://crispr.mit.edu>). We then validated the target region and checked for SNPs by  
526 PCR and sequencing of genomic DNA. We used Cas9 protein from PNABio and 2-part  
527 Alt-R guideRNAs from IDT. Single-stranded oligodeoxynucleotides (ssODNs) were  
528 ordered as Ultramers from IDT for generating the SNP mutations. The ssODNs  
529 included 100bp of homology arms as well as silent mutations in the guideRNA target  
530 site to prevent re-annealing of the guideRNA following homologous recombination.  
531 We also protected both ends of the ssODNs with 3 phosphorothioate bonds to  
532 inhibit exonuclease degradation in the cell.

### 533 Microinjection

534 We annealed the specific crRNA with tracrRNA to form the guideRNA complex,  
535 followed by hybridizing with the Cas9 protein to form a ribonucleoprotein (RNP)  
536 complex. The RNP was then injected into at least 200 and up to 1500 zebrafish  
537 embryos at the 1-cell stage.

#### 538 Screening and breeding

539 We designed genotypic screening assays to find mutants and confirm the expected  
540 location of the mutation. After injections, we screened for mutation success rate in  
541 the F0. We then outcrossed mosaic individuals to wildtype and tested for germline  
542 transmission rates and to raise potential heterozygous mutants.

543

#### 544 **Quantification of Advanced Glycation Endproduct (AGEs)**

545 We used Oxiselect™ Advanced Glycation End Product (AGE) Competitive Elisa Kit  
546 (San Diego, CA) according to the manufacturers protocol to measure AGE level in  
547 serum from 2-year-old fish that were fasted for 3 days.

548

#### 549 **Statistics and Figure preparation**

550 Figures and statistics were produced using R<sup>37</sup> and ggplot2<sup>38</sup> package.

551

#### 552 **Data availability**

553 The datasets generated during the current study are available in the Stowers  
554 original data repository and/or available from the corresponding author on  
555 reasonable request.

556

557

#### 558 **References**

- 559 1 Staples, J. F. Metabolic Flexibility: Hibernation, Torpor, and Estivation. *Compr Physiol* **6**, 737-  
560 771 (2016).
- 561 2 Culver, D. C. & Pipan, T. *The Biology of Caves and Other Subterranean Habitats*. (Oxford  
562 University Press, 2009).
- 563 3 Gross, J. B. The complex origin of *Astyanax* cavefish. *BMC Evol Biol* **12**, 105 (2012).
- 564 4 Bradic, M., Teotonio, H. & Borowsky, R. L. The population genomics of repeated evolution in  
565 the blind cavefish *Astyanax mexicanus*. *Mol Biol Evol* **30**, 2383-2400 (2013).
- 566 5 Carlson, B. M., Onusko, S. W. & Gross, J. B. A high-density linkage map for *Astyanax*  
567 *mexicanus* using genotyping-by-sequencing technology. *G3 (Bethesda)* **5**, 241-251 (2015).
- 568 6 Elipot, Y., Legendre, L., Pere, S., Sohm, F. & Retaux, S. *Astyanax* transgenesis and husbandry:  
569 how cavefish enters the laboratory. *Zebrafish* **11**, 291-299 (2014).
- 570 7 Casane, D. & Retaux, S. Evolutionary Genetics of the Cavefish *Astyanax mexicanus*. *Adv Genet*  
571 **95**, 117-159 (2016).
- 572 8 Aspiras, A. C., Rohner, N., Martineau, B., Borowsky, R. L. & Tabin, C. J. Melanocortin 4 receptor  
573 mutations contribute to the adaptation of cavefish to nutrient-poor conditions. *Proc Natl*  
574 *Acad Sci U S A* **112**, 9668-9673 (2015).

- 575 9 Moran, D., Softley, R. & Warrant, E. J. Eyeless Mexican cavefish save energy by eliminating the  
576 circadian rhythm in metabolism. *PLoS One* **9**, e107877 (2014).
- 577 10 Hüpopp, K. Oxygen consumption of *Astyanax fasciatus* (Characidae, Pisces). A comparison of  
578 epigeal and hypogean populations. *Environ. Biol. Fishes* **17**, 299–308 (1986).
- 579 11 Penney, C. C. & Volkoff, H. Peripheral injections of cholecystokinin, apelin, ghrelin and orexin  
580 in cavefish (*Astyanax fasciatus mexicanus*): effects on feeding and on the brain expression  
581 levels of tyrosine hydroxylase, mechanistic target of rapamycin and appetite-related  
582 hormones. *Gen Comp Endocrinol* **196**, 34-40 (2014).
- 583 12 Saltiel, A. R. & Kahn, C. R. Insulin signalling and the regulation of glucose and lipid  
584 metabolism. *Nature* **414**, 799-806 (2001).
- 585 13 Rines, A. K., Sharabi, K., Tavares, C. D. & Puigserver, P. Targeting hepatic glucose metabolism  
586 in the treatment of type 2 diabetes. *Nat. Rev. Drug Discov.* **15**, 786-804 (2016).
- 587 14 Navarro I, e. a. Insights into Insulin and Glucagon Responses in Fish. *Fish Physiology and*  
588 *Biochemistry* **27**, 205-216 (2002).
- 589 15 Lizcano, J. M. & Alessi, D. R. The insulin signalling pathway. *Curr Biol* **12**, R236-238 (2002).
- 590 16 McGaugh, S. E. *et al.* The cavefish genome reveals candidate genes for eye loss. *Nat Commun*  
591 **5**, 5307 (2014).
- 592 17 A. Atray, S. J., K. Thai, P. Hiremath, R.M. Anjana, R. Unnikrishnan, V. Mohan, V. Radha. Rabson  
593 Mendenhall Syndrome; a case report. *Journal of Diabetology* **2** (2013).
- 594 18 Carrera, P. *et al.* Substitution of Leu for Pro-193 in the insulin receptor in a patient with a  
595 genetic form of severe insulin resistance. *Hum Mol Genet* **2**, 1437-1441 (1993).
- 596 19 Taylor, S. I. *et al.* Mutations in insulin-receptor gene in insulin-resistant patients. *Diabetes*  
597 *Care* **13**, 257-279 (1990).
- 598 20 De Meyts, P. & Whittaker, J. Structural biology of insulin and IGF1 receptors: implications for  
599 drug design. *Nat. Rev. Drug Discov.* **1**, 769-783 (2002).
- 600 21 Wood, T. E., Burke, J. M. & Rieseberg, L. H. Parallel genotypic adaptation: when evolution  
601 repeats itself. *Genetica* **123**, 157-170 (2005).
- 602 22 Bradic, M., Beerli, P., Garcia-de Leon, F. J., Esquivel-Bobadilla, S. & Borowsky, R. L. Gene flow  
603 and population structure in the Mexican blind cavefish complex (*Astyanax mexicanus*). *BMC*  
604 *Evol Biol* **12**, 9 (2012).
- 605 23 Tajima, F. Statistical method for testing the neutral mutation hypothesis by DNA  
606 polymorphism. *Genetics* **123**, 585-595 (1989).
- 607 24 Kahn, B. B. & Flier, J. S. Obesity and insulin resistance. *J. Clin. Invest.* **106**, 473-481 (2000).
- 608 25 Albadri, S., Del Bene, F. & Revenu, C. Genome editing using CRISPR/Cas9-based knock-in  
609 approaches in zebrafish. *Methods* **121-122**, 77-85 (2017).
- 610 26 Borowsky, R. Restoring sight in blind cavefish. *Curr Biol* **18**, R23-24 (2008).
- 611 27 Hayes, A. J. *et al.* Spinal deformity in aged zebrafish is accompanied by degenerative changes  
612 to their vertebrae that resemble osteoarthritis. *PLoS One* **8**, e75787 (2013).
- 613 28 Yan, S. F., Ramasamy, R. & Schmidt, A. M. Mechanisms of disease: advanced glycation end-  
614 products and their receptor in inflammation and diabetes complications. *Nat. Clin. Pract.*  
615 *Endocrinol. Metab.* **4**, 285-293 (2008).
- 616 29 Prasad, A., Bekker, P. & Tsimikas, S. Advanced glycation end products and diabetic  
617 cardiovascular disease. *Cardiol. Rev.* **20**, 177-183 (2012).
- 618 30 Keene, A., Yoshizawa, M. & McGaugh, S. *Biology and Evolution of the Mexican Cavefish*. (New  
619 York: Academic Press, 2015).
- 620 31 Bolger, A. M., Lohse, M. & Usadel, B. Trimmomatic: a flexible trimmer for Illumina sequence  
621 data. *Bioinformatics* **30**, 2114-2120 (2014).
- 622 32 Li, H. & Durbin, R. Fast and accurate long-read alignment with Burrows-Wheeler transform.  
623 *Bioinformatics* **26**, 589-595 (2010).
- 624 33 Van der Auwera, G. A. *et al.* From FastQ data to high confidence variant calls: the Genome  
625 Analysis Toolkit best practices pipeline. *Curr Protoc Bioinformatics* **43**, 11 10 11-33 (2013).
- 626 34 Danecek, P. *et al.* The variant call format and VCFtools. *Bioinformatics* **27**, 2156-2158 (2011).
- 627 35 Fariello, M. I., Boitard, S., Naya, H., SanCristobal, M. & Servin, B. Detecting signatures of  
628 selection through haplotype differentiation among hierarchically structured populations.  
629 *Genetics* **193**, 929-941 (2013).

630 36 Tomomori-Sato, C. *et al.* A mammalian mediator subunit that shares properties with  
631 Saccharomyces cerevisiae mediator subunit Cse2. *J Biol Chem* **279**, 5846-5851 (2004).  
632 37 Team, R. C. R: *A language and environment for statistical computing*, <[https://www.R-](https://www.R-project.org/)  
633 [project.org/](https://www.R-project.org/)> (2016).  
634 38 Wickham, H. *ggplot2: Elegant Graphics for Data Analysis*. (Springer-Verlag, New York, 2009).  
635

636

637 **Acknowledgments:** We thank Yashodhan Chinchore and Cem Sengel for technical  
638 advice; Xin Gao for bioinformatic support; Zachary Zakibe for photographs of the  
639 fish; the entire Aquatics facility at Stowers for fish maintenance and support; the cell  
640 culture core at Stowers for cell line maintenance and advice; the molecular biology  
641 core at Stowers for design, execution, and validation of the CRISPR constructs; the  
642 proteomics core; in particular, Michaela Levy for advice and computational  
643 modeling of the insulin receptor; Adam Herman for help with the genome scan;  
644 Mark Miller for illustration; and Stacey Williams, Fleur Damen, and Kira Fox for  
645 helpful feedback on the manuscript text. This work was supported by a grant from  
646 the NIH to C.J.T. (HD089934) and institutional funding to N.R. M.R.R was supported  
647 by a National Research Service Award (DK108495).

648

#### 649 **Author contributions**

650 Author contributions: AA, MR, NR, CT conceived of project and designed research  
651 with additional contributions from KG, RP, AB. AA, MR, KG, RP, JS, BM, MP, AB, JT,  
652 SM, RB, NR performed the research. AA, MR, CT, NR wrote the paper.

653

#### 654 **Author information**

655 The authors declare no competing financial interest. Correspondence and request

656 for materials should be addressed to [nro@stowers.org](mailto:nro@stowers.org) or

657 [tabin@genetics.med.harvard.edu](mailto:tabin@genetics.med.harvard.edu)

658

659
